# Supplementary material for: Turgor-responsive starch phosphorylation in Oryza sativa stems: A primary event of starch degradation associated with grain-filling ability
Source: PubMed Central journal article supplement (PMC5519062; doi:10.1371/journal.pone.0181272), 2017-07-20
Supplement: pone.0181272.s001.pdf [file pone.0181272.s001.pdf]

**S1 Table. Solar radiation and mean temperature at each growth stage between 2012-2014.** T: transplanting time (mid-June), PI: panicle initiation stage (early August), FH: full heading stage (early September), DAH: days after heading, M: maturity (middle October).

| Year | Solar radiation (MJ m <sup>-2</sup> ) |       |          |         | Mean temperature (°C) |       |          |         |
|------|---------------------------------------|-------|----------|---------|-----------------------|-------|----------|---------|
|      | T-PI                                  | PI-FH | FH-20DAH | 21DAH-M | T-PI                  | PI-FH | FH-20DAH | 21DAH-M |
| 2012 | 16.8                                  | 18.3  | 16.9     | 15.6    | 27.1                  | 28.7  | 26.3     | 20.2    |
| 2013 | 18.0                                  | 21.2  | 15.6     | 16.1    | 27.4                  | 29.7  | 25.3     | 24.5    |
| 2014 | 15.0                                  | 14.1  | 16.4     | 12.8    | 26.3                  | 26.3  | 24.9     | 21.7    |
