# Supplementary material for: Turgor-responsive starch phosphorylation in Oryza sativa stems: A primary event of starch degradation associated with grain-filling ability
Source: PubMed Central journal article supplement (PMC5519062; doi:10.1371/journal.pone.0181272), 2017-07-20
Supplement: pone.0181272.s002.pdf [file pone.0181272.s002.pdf]

**S2 Table. Within-panicle ripened grains of two high-yielding rice cultivars, Hokuriku193 and Momiroman.** To evaluate the within-panicle filling rate, each panicle was dissected into two portions (upper and lower). Upper and lower in the panicle corresponded to the first to the six, the six to the eleventh primary rachis branches, counting from the uppermost primary rachis branch, respectively. Spikelets in each portion were further classified as classified previously [50]. The tertiary pedicels were isolated from every portion and the rest of the kernels attached to the primary and secondary rachis branches and secondary pedicels were pooled together. Data indicate the mean of three replications. Significant difference at  $p = 0.01$ , and  $0.001$  is indicated by \*\* and \*\*\*, respectively; ns indicates not significant.

| Year                    | Cultivar | Positions in a panicle                                       |                   |                                                              |                   |
|-------------------------|----------|--------------------------------------------------------------|-------------------|--------------------------------------------------------------|-------------------|
|                         |          | Upper position                                               |                   | Lower position                                               |                   |
|                         |          | Primary and secondary rachis branches and secondary pedicels | Tertiary pedicels | Primary and secondary rachis branches and secondary pedicels | Tertiary pedicels |
|                         |          | %                                                            | %                 | %                                                            | %                 |
| 2012                    | H193     | 97.3                                                         | 88.7              | 92.0                                                         | 90.5              |
|                         | Momi     | 93.8                                                         | 63.1              | 90.8                                                         | 33.5              |
| Cultivar ( $p$ )        |          |                                                              | ns                |                                                              | **                |
| 2013                    | H193     | 96.2                                                         | 91.6              | 84.9                                                         | 81.9              |
|                         | Momi     | 76.6                                                         | 68.0              | 84.0                                                         | 44.6              |
| Cultivar ( $p$ )        |          |                                                              | ***               |                                                              | ns                |
| 2014                    | H193     | 92.8                                                         | 89.5              | 94.3                                                         | 84.2              |
|                         | Momi     | 92.4                                                         | 64.3              | 87.9                                                         | 24.9              |
| Cultivar ( $p$ )        |          |                                                              | ns                |                                                              | **                |
| Cultivar mean           | H193     | 95.5                                                         | 90.0              | 90.4                                                         | 85.6              |
|                         | Momi     | 87.6                                                         | 65.1              | 87.6                                                         | 34.3              |
| Cultivar ( $p$ )        |          | ns                                                           | ***               | ns                                                           | ***               |
| Year effect ( $p$ )     |          | ns                                                           | ns                | ns                                                           | ns                |
| Cultivar x year ( $p$ ) |          | ns                                                           | ns                | ns                                                           | ns                |
