# Supplementary material for: Turgor-responsive starch phosphorylation in Oryza sativa stems: A primary event of starch degradation associated with grain-filling ability
Source: PubMed Central journal article supplement (PMC5519062; doi:10.1371/journal.pone.0181272), 2017-07-20
Supplement: pone.0181272.s003.pdf [file pone.0181272.s003.pdf]

**S3 Table. Summary of absolute amounts of all gene expressions analyzed in two high-yielding rice cultivars, Hokuriku193 and Momiroman. Mean±SEs ( $n=3$ ). Significant difference at  $p = 0.05$  and  $p = 0.01$  are indicated by \* and \*\*, respectively ( $t$ -test).**

| Gene     | Description                                | Cultivar     | Log <sub>2</sub> copies ng total RNA <sup>-1</sup> |                 |              |                 |
|----------|--------------------------------------------|--------------|----------------------------------------------------|-----------------|--------------|-----------------|
|          |                                            |              | -1 DAH                                             | 4 DAH           | 9 DAH        | 18 DAH          |
| AGPL1    | AGPase large subunit 1                     | Hokuriku 193 | 16.18 ± 0.48                                       | 16.26 ± 0.45    | 15.00 ± 0.34 | 10.20 ± 0.25    |
|          |                                            | Momiroman    | 15.64 ± 0.35                                       | 16.89 ± 0.46    | 14.16 ± 1.39 | 10.30 ± 0.42    |
| AGPS1    | AGPase small subunit 1                     | Hokuriku 193 | 15.35 ± 0.56                                       | 15.12 ± 0.53    | 14.41 ± 0.22 | 11.32 ± 0.23    |
|          |                                            | Momiroman    | 15.66 ± 0.36                                       | 16.20 ± 0.32    | 14.46 ± 0.79 | 11.48 ± 0.18    |
| AMY2A    | α-amylase 2A                               | Hokuriku 193 | 8.32 ± 0.74                                        | 10.20 ± 0.29 *  | 9.38 ± 0.69  | 11.25 ± 0.25    |
|          |                                            | Momiroman    | 7.32 ± 0.45                                        | 6.72 ± 0.72     | 7.86 ± 0.77  | 11.22 ± 0.64    |
| BAM2     | β-amylase 2                                | Hokuriku 193 | 9.52 ± 0.22                                        | 11.98 ± 0.30 *  | 11.48 ± 0.40 | 13.88 ± 0.14 ** |
|          |                                            | Momiroman    | 8.50 ± 0.32                                        | 8.47 ± 0.31     | 9.66 ± 0.57  | 12.00 ± 0.36    |
| BAM3     | β-amylase 3                                | Hokuriku 193 | 7.46 ± 0.36                                        | 7.48 ± 1.14     | 6.50 ± 0.07  | 8.33 ± 0.04     |
|          |                                            | Momiroman    | 5.93 ± 1.16                                        | 7.36 ± 0.78     | 5.79 ± 1.25  | 6.54 ± 0.54     |
| BAM8     | β-amylase 8                                | Hokuriku 193 | 8.40 ± 0.56                                        | 8.17 ± 0.29     | 7.63 ± 0.32  | 7.01 ± 0.12     |
|          |                                            | Momiroman    | 8.31 ± 0.60                                        | 8.77 ± 0.09     | 7.46 ± 0.32  | 7.00 ± 0.31     |
| BAM9     | β-amylase 9                                | Hokuriku 193 | 10.23 ± 0.48                                       | 11.90 ± 0.41    | 11.32 ± 0.10 | 13.82 ± 0.08    |
|          |                                            | Momiroman    | 10.28 ± 0.24                                       | 9.81 ± 0.61     | 10.83 ± 0.64 | 13.28 ± 0.23    |
| BE1      | Branching enzyme I                         | Hokuriku 193 | 11.29 ± 0.36 *                                     | 11.01 ± 0.42 ** | 10.44 ± 0.21 | 9.46 ± 0.15 *   |
|          |                                            | Momiroman    | 12.55 ± 0.13                                       | 13.43 ± 0.29    | 12.05 ± 0.65 | 10.15 ± 0.18    |
| GBSS2    | Granule-bound starch synthase II           | Hokuriku 193 | 14.35 ± 0.33                                       | 14.21 ± 0.39    | 13.39 ± 0.16 | 10.99 ± 0.08    |
|          |                                            | Momiroman    | 14.69 ± 0.12                                       | 15.07 ± 0.26    | 13.37 ± 0.82 | 10.77 ± 0.32    |
| GWD1     | Glucan, water dikinase 1                   | Hokuriku 193 | 12.46 ± 0.57                                       | 13.59 ± 0.44 *  | 12.50 ± 0.20 | 11.16 ± 0.27    |
|          |                                            | Momiroman    | 10.88 ± 0.26                                       | 11.81 ± 0.18    | 11.11 ± 0.54 | 10.27 ± 0.17    |
| ISA3     | Isoamylase 3                               | Hokuriku 193 | 8.68 ± 0.73                                        | 9.43 ± 0.75     | 8.44 ± 0.10  | 7.47 ± 0.29     |
|          |                                            | Momiroman    | 8.90 ± 0.47                                        | 10.39 ± 0.22    | 8.69 ± 0.59  | 8.04 ± 0.05     |
| MEX1     | Chloroplast maltose exporter 1             | Hokuriku 193 | 8.81 ± 0.37                                        | 8.75 ± 0.54     | 7.87 ± 0.21  | 8.40 ± 0.15     |
|          |                                            | Momiroman    | 9.19 ± 0.25                                        | 9.56 ± 0.16     | 8.34 ± 0.62  | 8.02 ± 0.11     |
| pGlcT    | Plastidial glucose transporter             | Hokuriku 193 | 8.52 ± 0.56                                        | 8.97 ± 0.46     | 8.67 ± 0.03  | 8.78 ± 0.10     |
|          |                                            | Momiroman    | 9.15 ± 0.19                                        | 9.66 ± 0.21     | 8.39 ± 0.30  | 8.89 ± 0.25     |
| PWD-like | Phosphoglucan, water dikinase-like protein | Hokuriku 193 | 7.70 ± 0.92                                        | 8.67 ± 0.40     | 8.16 ± 0.14  | 8.75 ± 0.17     |
|          |                                            | Momiroman    | 7.91 ± 0.25                                        | 8.31 ± 0.36     | 8.07 ± 0.16  | 8.40 ± 0.16     |
| SS2b     | Starch synthase IIb                        | Hokuriku 193 | 11.45 ± 0.55                                       | 11.60 ± 0.51    | 10.89 ± 0.01 | 10.51 ± 0.31    |
|          |                                            | Momiroman    | 12.46 ± 0.27                                       | 12.73 ± 0.27    | 11.05 ± 0.58 | 10.22 ± 0.07    |
| SUT1     | Sucrose transporter 1                      | Hokuriku 193 | 8.17 ± 0.46                                        | 8.80 ± 0.45     | 8.27 ± 0.18  | 10.49 ± 0.25    |
|          |                                            | Momiroman    | 9.52 ± 0.33                                        | 9.69 ± 0.69     | 9.15 ± 0.24  | 10.61 ± 0.24    |
