# Supplementary material for: Turgor-responsive starch phosphorylation in Oryza sativa stems: A primary event of starch degradation associated with grain-filling ability
Source: PubMed Central journal article supplement (PMC5519062; doi:10.1371/journal.pone.0181272), 2017-07-20
Supplement: pone.0181272.s004.pdf [file pone.0181272.s004.pdf]

**S4 Table. Primer sequences used in quantitative RT-PCR. \*Ref.[54].**

| Gene            | Locus ID     | Forward primer (5'-3')    | Reverse primer (5'-3')   |
|-----------------|--------------|---------------------------|--------------------------|
| <i>AGPL1</i>    | Os05g0580000 | GTCATCACAAACAGCGAGGGTG    | GAGATCTGTGGCATCAGCGAG    |
| <i>AGPS1</i>    | Os09g0298200 | ACGCCTTAATCCCTAGCGGAAC    | TGCTGCAAGGCCCAACCTTATG   |
| <i>AMY2A</i>    | Os06g0713800 | CGTCGCACTCCGTCTCCAC       | GATCAACGACTTCAACTCCATC   |
| <i>BAM2</i>     | Os10g0465700 | ATGGAGATGGCCCGCAAGAC      | ACCTCGGGAGCGGGATGTTG     |
| <i>BAM3</i>     | Os03g0141200 | TCGGCGACTCAGTCACTATAACCAC | AGCGAGAGGTATTCGTAGTTGCG  |
| <i>BAM8</i>     | Os09g0569200 | CGGTTACAAGCGACTCTTCC      | CTTCCGATCTCTGTTACCCAATG  |
| <i>BAM9</i>     | Os03g0351300 | CCGCCTTCCATGACTTCTTG      | CGGATACGAAGGGTACTTGAG    |
| <i>BE1</i>      | Os06g0726400 | TTGGTGGCCATGGAAGAGTTGG    | TTCTGGTACTCCTGGCATTCCC   |
| <i>GBSS2</i>    | Os07g0412100 | AGGGATGAGATATGGAGTGGTTC   | CGTCCACTGGATCAACAGTTTC   |
| <i>GWD1</i>     | Os06g0498400 | GCGAAATACGGAAAACCTGTTCTC  | GTTGGTCACCTTCATCTCCAG    |
| <i>ISA3</i>     | Os09g0469400 | CAATGCACATGACTATTTTGTGGAC | AGCAGAATGGAAGAGTATGGAGC  |
| <i>MEX1</i>     | Os04g0602400 | TTTCTTGGCAACAACATTTGGAC   | CTTCAAAGAAGTCACGGGTGAG   |
| <i>pGlcT*</i>   | Os01g0133400 | TGGAGCTTCGAGGGTTGTGA      | CGGTGGCATACTGGCATCTA     |
| <i>PWD-like</i> | Os12g0297500 | CTCTTTCTGTTCTTGCTTCATTGTC | CTTGAGCGCATCCTCCATTG     |
| <i>SS2b</i>     | Os02g0744700 | ACAACATTGCTCATCAGGGTCGTG  | ATCGATGTAGTGCTCGGGCAAG   |
| <i>SUT1</i>     | Os03g0170900 | TGCCTCGTCCTCTTTGCGTTTC    | GCGATGACCACCTGAGGGATG    |
| <i>UBQ5</i>     | Os01g0328400 | CAGGCTTAGGCGTAGGCTC       | CATCTAATAACCAGTTCGATTTCC |
