# Supplementary material for: Turgor-responsive starch phosphorylation in Oryza sativa stems: A primary event of starch degradation associated with grain-filling ability
Source: PubMed Central journal article supplement (PMC5519062; doi:10.1371/journal.pone.0181272), 2017-07-20
Supplement: pone.0181272.s005.pdf [file pone.0181272.s005.pdf]

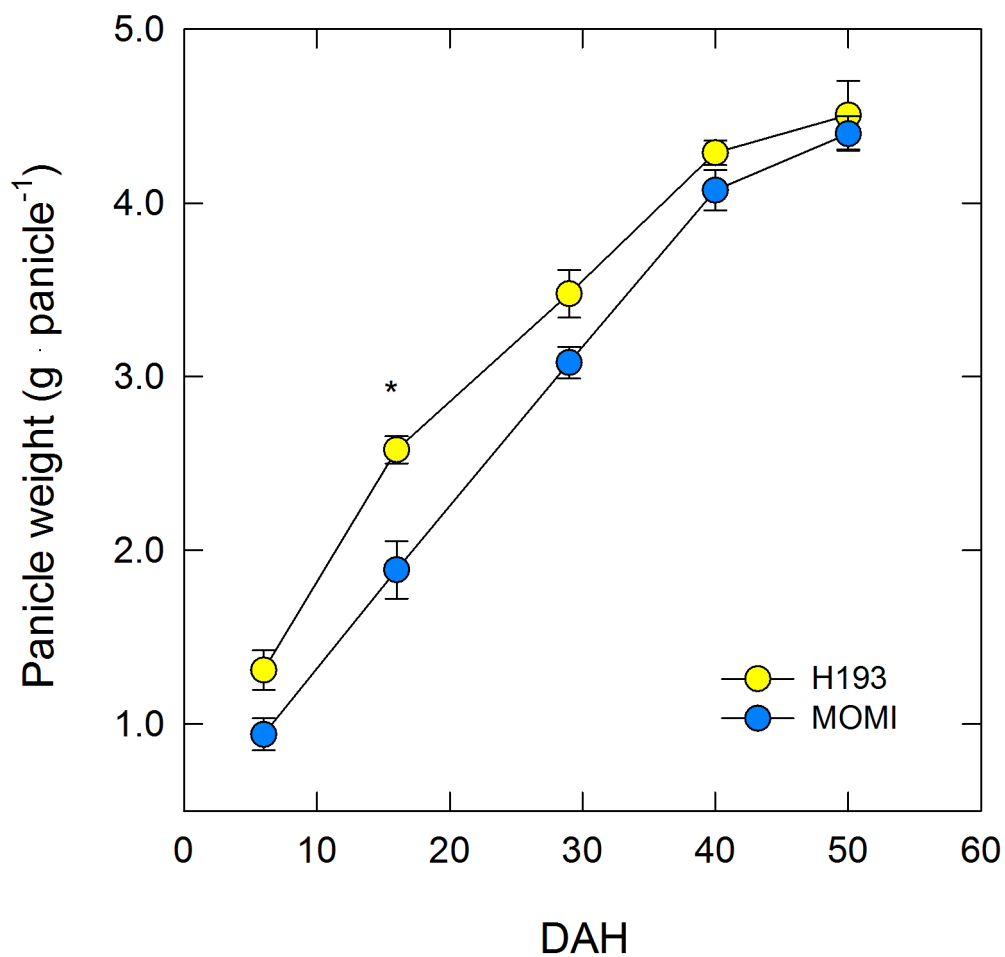

**S1 Figure. Time course of changes in panicle dry weight of two high-yielding rice cultivars during development in field-grown plants in 2013.** Yellow and light blue circles indicate H193 and MOMI, respectively. Data are the mean  $\pm$  SEs ( $n=3$ ) from the panicles collected from three independently repeated experimental plots. Significance at the 0.05 probability level is indicated with \*.
