# Supplementary material for: Turgor-responsive starch phosphorylation in Oryza sativa stems: A primary event of starch degradation associated with grain-filling ability
Source: PubMed Central journal article supplement (PMC5519062; doi:10.1371/journal.pone.0181272), 2017-07-20
Supplement: pone.0181272.s007.pdf [file pone.0181272.s007.pdf]

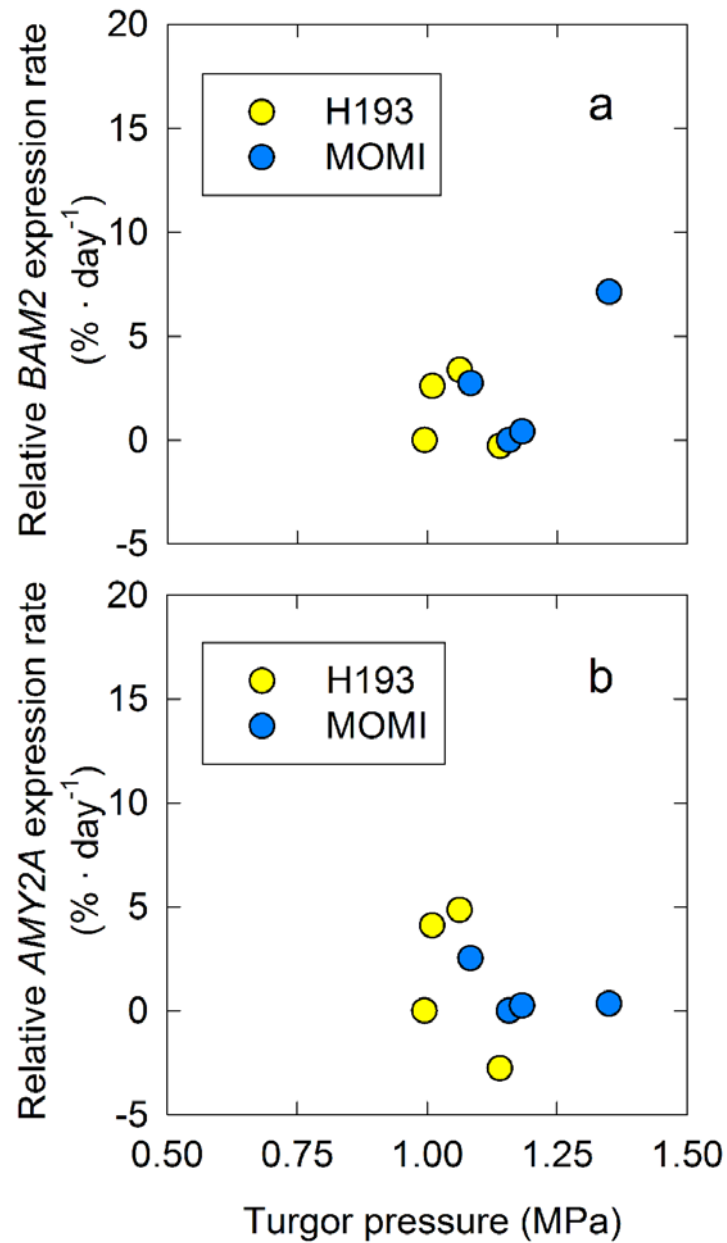

**S3 Figure. Relative expression rate of two major amylase-related genes, *BAM2* (a) and *AMY2A* (b) plotted against turgor pressure in the mature region of INT3 in two high-yielding rice cultivars. Yellow and light blue symbols indicate H193 and MOMI, respectively.**
